# Supplementary material for: A rheumatoid arthritis magnetic resonance imaging contrast agent based on folic acid conjugated PEG-b-PAA@SPION
Source: Royal Society of Chemistry journal article supplement (doi:10.1039/c4tb00085d), 2014-01-01
Supplement: c4tb00085d1.pdf [file c4tb00085d1.pdf]

## Supporting information

### A rheumatoid arthritis magnetic resonance imaging contrast based on folic acid conjugated PEG-b-PAA@SPION

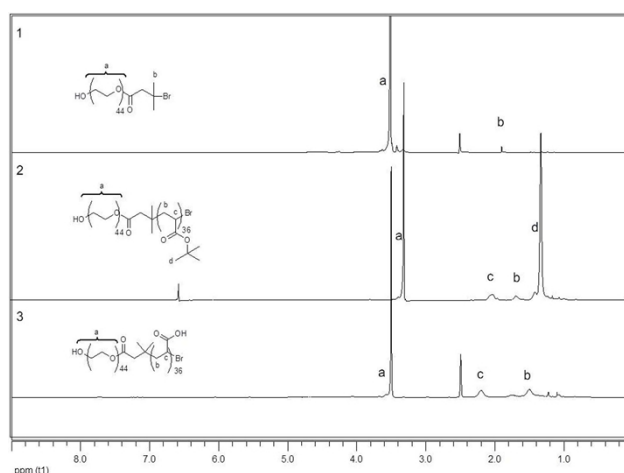

**Fig. S1**  $^1\text{H}$  NMR spectra of (1) PEG-b-PtBA<sub>18</sub>, (2) PEG-b-PtBA<sub>36</sub> and (3) PEG-b-PtBA<sub>57</sub> dissolved in  $\text{CDCl}_3$ .

The amounts of PEG-PAA<sub>x</sub> on the SPIO were assessed by TGA (Fig. S2). As shown in Fig. 8, the weight percentages of organic polymer on PEG-b-PAA<sub>57</sub>@SPIO, FA-PEG-b-PAA<sub>57</sub>@SPIO, PEG-b-PAA<sub>36</sub>@SPIO and FA-PEG-b-PAA<sub>36</sub>@SPIO are 89.76%, 91.72%, 69.52% and 67.53% respectively. The major mass loss occurred from 200 to 450 °C and can be ascribed to the pyrolysis of PEG-b-PAA polymer, while mass loss of residual solvent or hydro dioxide during 0°C to 200°C are relatively low. The mass loss remains stable when the temperature come to 800 °C, which means all the organic content are pyrolysed.

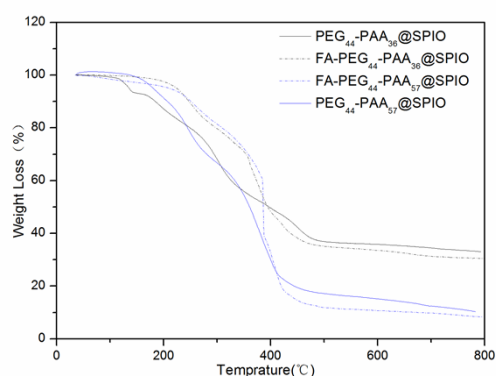

**Fig. S2** Thermogravimetric analysis of PEG-b-PAA<sub>57</sub>@SPIO, FA-PEG-b-PAA<sub>57</sub>@SPIO, PEG-b-PAA<sub>36</sub>@SPIO and FA-PEG-b-PAA<sub>36</sub>@SPIO

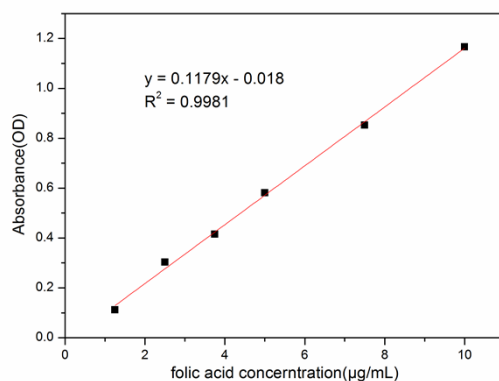

**Fig. S3** calibration curve of free FA

In Fig. S4, the uptake of SPIO increased with the gradually increasing concentration of SPIO. At the concentration of 400 µg/mL, the cell uptake amount seems to reach a platform as the difference between 400 µg/mL and 800 µg/mL of FA-PEG-PAA<sub>36</sub>@SPIO are not significantly distinct, which indicates that 400 µg/mL is an idea concentration for uptake. We chose 400 µg/mL as constant concentration for time dependent endocytosis (Fig. S5). Results show that cell uptake of FA-PEG-

PAA<sub>36</sub>@SPIO increases with the increasing uptake time. Platform time is about 6 h after incubation. Therefore, the idea time and concentration for SPIO incubation is 6 h and 400 μg/mL.

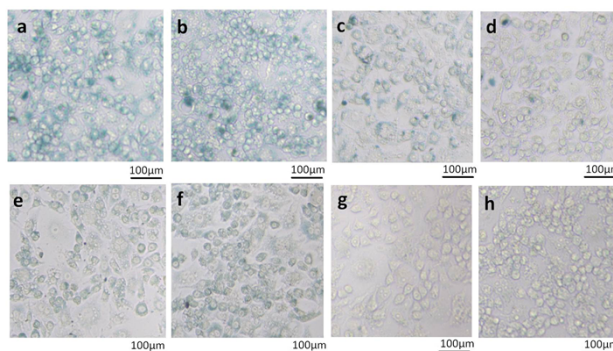

**Fig. S4** Prussian blue staining of RAW 264.7 cells incubated with SPIO at the iron concentrations of 800 μg/mL (a: FA-PEG-PAA<sub>36</sub>@SPIO, e: PEG-PAA<sub>36</sub>@SPIO), 400 μg/mL (b: FA-PEG-PAA<sub>36</sub>@SPIO, f: FA-PEG-PAA<sub>36</sub>@SPIO), 200 μg/mL (c: FA-PEG-PAA<sub>36</sub>@SPIO, g: FA-PEG-PAA<sub>36</sub>@SPIO), and 100 μg/mL (d: FA-PEG-PAA<sub>36</sub>@SPIO, h: FA-PEG-PAA<sub>36</sub>@SPIO) for 6 h.

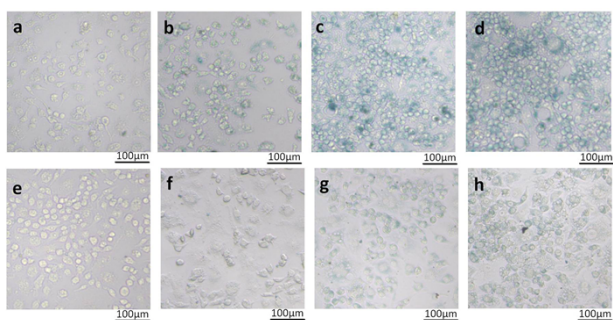

**Fig. S5** Prussian blue staining of RAW 264.7 cells incubated with SPIO at the iron concentration of 400 μg/mL for 2h ((a: FA-PEG-PAA<sub>36</sub>@SPIO, e: PEG-PAA<sub>36</sub>@SPIO), 4h (b: FA-PEG-PAA<sub>36</sub>@SPIO, f: PEG-PAA<sub>36</sub>@SPIO), 6h (c: FA-PEG-PAA<sub>36</sub>@SPIO, g: PEG-PAA<sub>36</sub>@SPIO) and 8h (d: FA-PEG-PAA<sub>36</sub>@SPIO, h: PEG-PAA<sub>36</sub>@SPIO).

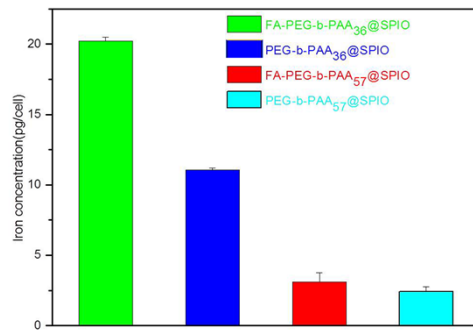

**Fig. S6** Fe concentration (pg/cell) of the RAW 264.7 cells uptake FA-PEG-b-PAA<sub>57</sub>@SPION, FA-PEG-b-PAA<sub>36</sub>@SPION, PEG-b-PAA<sub>57</sub>@SPION, and PEG-b-PAA<sub>36</sub>@SPION.

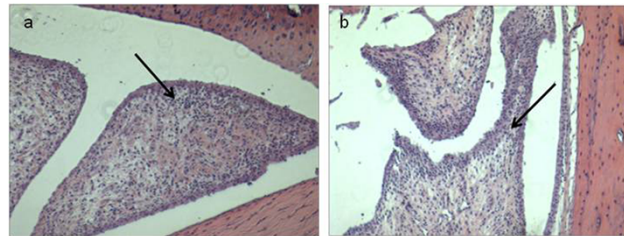

**Fig. S7** H&E staining of adjuvant induced arthritic ankle joint synovium, heterogeneous distributed massive of macrophage (arrows) can be observed in synovium(a,b).
